# Supplementary material
Source: MDPI journal article supplement (https://www.mdpi.com/1424-2818/14/1/22)
Supplement: s1 [file s1]

**Table S2.** Detailed list of places (towns) in which the occurrence of *Cydalima perspectalis* was recorded and confirmed in 2018-2020.

| Voivodeship         | Number<br>on the<br>map | Places/towns (number of records)                                                                       |                                                                             |                                                                                                                                                                                                                                 |
|---------------------|-------------------------|--------------------------------------------------------------------------------------------------------|-----------------------------------------------------------------------------|---------------------------------------------------------------------------------------------------------------------------------------------------------------------------------------------------------------------------------|
|                     |                         | 2018                                                                                                   | 2019                                                                        | 2020                                                                                                                                                                                                                            |
| POLAND              | 1-16                    | 166                                                                                                    | 188                                                                         | 320                                                                                                                                                                                                                             |
| West Pomeranian     | 1                       |                                                                                                        | Szczecin (1×)                                                               | Szczecin (3×)                                                                                                                                                                                                                   |
| Pomeranian          | 2                       |                                                                                                        | Gdańsk (3×)                                                                 | Gdańsk (1×)                                                                                                                                                                                                                     |
| Warmian-Masurian    | 3                       |                                                                                                        |                                                                             | Elbląg (1×), Ełk (1×), Olsztyn (3×)                                                                                                                                                                                             |
| Lubusz              | 4                       |                                                                                                        | Gorzów Wielkopolski (1×), Lubsko (1×), Nowa Sól (1×)                        | Gorzów Wielkopolski (1×), Lubsko (1×), Nowa Sól (1×), Świebodzin (1×), Zielona Góra (1×), Żagań (1×)                                                                                                                            |
| Greater Poland      | 5                       | Kalisz (1×), Kępno (1×), Leszno (1×)                                                                   | Konin (1×), Ostrów Wielkopolski (1×), Poznań (5×), Zaniemyśl (1×)           | Dopiewo (1×), Kalisz (3×), Kiekrz (1×), Konin (1×), Kościan (1×), Leszno (3×), Ostrów Wielkopolski (3×), Poznań (6×), Rawicz (1×), Swarzędz (1×), Szamotuły (1×), Zaniemyśl (1×)                                                |
| Kuyavian-Pomeranian | 6                       |                                                                                                        |                                                                             | Bydgoszcz (1×), Toruń (3×)                                                                                                                                                                                                      |
| Masovian            | 7                       | Grodzisk Mazowiecki (1×), Grójec (1×), Kampinos (1×), Mińsk Mazowiecki (4×), Radom (4×), Warszawa (6×) | Łomianki (1×), Płock (1×), Radom (4×), Solec nad Wisłą (1×), Warszawa (10×) | Brwinów (1×), Garbatka-Letnisko (1×), Grodzisk Mazowiecki (1×), Łomianki (1×), Mińsk Mazowiecki (3×), Ostrołęka (1×), Płock (3×), Radom (4×), Siedlce (3×), Sochaczew (1×), Solec nad Wisłą (1×), Warszawa (8×), Wieliszew (1×) |

|                |    |                                                                                                              |                                                                                                                 |                                                                                                                                                                               |
|----------------|----|--------------------------------------------------------------------------------------------------------------|-----------------------------------------------------------------------------------------------------------------|-------------------------------------------------------------------------------------------------------------------------------------------------------------------------------|
| Podlaskie      | 8  |                                                                                                              |                                                                                                                 | Białystok (3×), Bielsk Podlaski (1×),<br>Ciechanowiec (1×), Łomża (1×),<br>Suwałki (1×), Szepietowo (1×)                                                                      |
| Lower Silesian | 9  | Bolesławiec (1×), Legnica (1×),<br>Oleśnica (1×), Oława (3×), Świdnica<br>(1×), Trzebnica (3×), Wrocław (9×) | Legnica (1×), Niemcza (1×), Oborniki<br>Śląskie (1×), Trzebnica (5×), Wrocław<br>(15×)                          | Kobierzyce (1×), Legnica (1×), Niemcza<br>(1×), Oleśnica (1×), Strzelin (1×),<br>Trzebnica (4×), Wałbrzych (3×),<br>Wrocław (7×)                                              |
| Łódź           | 10 | Łódź (1×), Piotrków Trybunalski (1×),<br>Sieradz (1×), Wieluń (1×),                                          | Łódź (1×)                                                                                                       | Aleksandrów Łódzki (1×), Bełchatów<br>(1×), Łódź (4×), Opoczno (3×),<br>Piotrków Trybunalski (1×), Radomsko<br>(1×), Sokolniki (1×), Tomaszów<br>Mazowiecki (1×), Wieluń (1×) |
| Holy Cross     | 11 | Jędrzejów (1×), Ostrowiec<br>Świętokrzyski (1×)                                                              | Kielce (3×), Ostrowiec Świętokrzyski<br>(1×)                                                                    | Busko-Zdrój (1×), Jędrzejów (1×),<br>Kielce (3×), Opatów (1×), Ostrowiec<br>Świętokrzyski (1×), Starachowice (1×),<br>Tokarnia (1×)                                           |
| Lublin         | 12 | Kraśnik (4×), Lublin (4×), Zamość (3×)                                                                       | Kraśnik (1×), Lublin (6×), Puławy (3×),<br>Zamość (1×)                                                          | Biłgoraj (1×), Kraśnik (1×), Lublin (5×),<br>Łęczna (1×), Poturzyn (1×), Puławy<br>(4×), Radzyń Podlaski (1×), Świdnik<br>(1×), Tomaszów Lubelski (3×), Zamość<br>(1×)        |
| Opole          | 13 | Opole (6×), Strzelce Opolskie (4×)                                                                           | Krapkowice (1×), Kędzierzyn-Koźle<br>(1×), Opole (1×), Tułowice (1×)                                            | Brzeg (3×), Kędzierzyn-Koźle (1×),<br>Krapkowice (1×), Opole (5×), Tułowice<br>(1×)                                                                                           |
| Silesian       | 14 | Bielsko Biała (1×), Bytom (1×),<br>Chorzów (4×), Częstochowa (1×),<br>Katowice (3×), Lubliniec (1×),         | Bielsko-Biała (3×), Bytom (1×),<br>Chorzów (4×), Cieszyn (1×), Czeladź<br>(1×), Częstochowa (5×), Gliwice (1×), | Bielsko-Biała (3×), Bytom (1×),<br>Chorzów (5×), Cieszyn (1×), Czeladź<br>(1×), Częstochowa (4×), Gliwice (1×),                                                               |

---

|               |    |                                                                                                                                                                             |                                                                                                                                                                                                                                                        |                                                                                                                                                                                                                                                                                                                                                                                                                                             |
|---------------|----|-----------------------------------------------------------------------------------------------------------------------------------------------------------------------------|--------------------------------------------------------------------------------------------------------------------------------------------------------------------------------------------------------------------------------------------------------|---------------------------------------------------------------------------------------------------------------------------------------------------------------------------------------------------------------------------------------------------------------------------------------------------------------------------------------------------------------------------------------------------------------------------------------------|
|               |    | Racibórz (3×), Rybnik (1×), Tychy (1×), Wodzisław Śląski (1×), Zabrze (1×)                                                                                                  | Jastrzębie-Zdrój (1×), Jaworzno (1×), Katowice (3×), Lubliniec (1×), Mysłowice (1×), Racibórz (3×), Radlin (1×), Ruda Śląska (1×), Rybnik (3×), Świętochłowice (1×), Tychy (1×), Wodzisław Śląski (1×), Zabrze (1×), Ząbkowice Śląskie (1×), Żory (1×) | Jastrzębie-Zdrój (1×), Jaworzno (1×), Katowice (4×), Lubliniec (3×), Mysłowice (1×), Oborniki Śląskie (1×), Racibórz (3×), Radlin (1×), Ruda Śląska (1×), Rybnik (1×), Siemianowice Śląskie (1×), Świętochłowice (1×), Tarnowskie Góry (1×), Tychy (1×), Wodzisław Śląski (1×), Wojkowice (1×), Zabrze (1×), Ząbkowice Śląskie (1×), Żory (1×)                                                                                              |
| Lesser Poland | 15 | Bochnia (3×), Chrzanów (1×), Kraków (12×), Myślenice (1×), Oświęcim (1×), Skawina (1×), Tarnów (8×), Wieliczka (1×)                                                         | Andrychów (1×), Brzesko (3×), Kraków (10×), Krzeszowice (1×), Libiąż (1×), Myślenice (1×), Tarnów (5×), Trzebinia (1×), Wadowice (1×), Wieliczka (1×)                                                                                                  | Andrychów (1×), Brzesko (4×), Gorlice (1×), Kraków (15×), Krzeszowice (1×), Libiąż (1×), Myślenice (1×), Nowy Sącz (1×), Tarnów (6×), Trzebinia (1×), Wadowice (3×), Wieliczka (1×)                                                                                                                                                                                                                                                         |
| Subcarpathian | 16 | Albigowa (6×), Jarosław (4×), Krosno (1×), Łańcut (3×), Mielec (1×), Tarnobrzeg (3×), Przeworsk (3×), Rzeszów (21×), Sanok (1×), Sokołów Małopolski (8×), Stalowa Wola (3×) | Albigowa (1×), Dynów (4×), Góra Ropczycka (1×), Husów (1×), Jarosław (4×), Krosno (1×), Leżajsk (3×), Łańcut (4×), Mielec (1×), Przemyśl (6×), Ropczyce (1×), Rzeszów (17×), Sanok (1×), Sędziszów Małopolski (4×), Stalowa Wola (1×)                  | Albigowa (1×), Bolestraszyce (3×), Brzozów (1×), Dębica (3×), Dukla (1×), Dynów (1×), Góra Ropczycka (1×), Husów (1×), Jarosław (3×), Jasło (1×), Krosno (3×), Lesko (1×), Leżajsk (4×), Łańcut (5×), Mielec (1×), Nienadówka (4×), Orzechowce (1×), Przemyśl (10×), Ropczyce (3×), Rudnik nad Sanem (1×), Rzeszów (36×), Sanok (1×), Sędziszów Małopolski (1×), Sokołów Małopolski (1×), Stalowa Wola (1×), Tarnobrzeg (1×), Żurawica (1×) |

---
