# Supplementary material
Source: MDPI journal article supplement (https://www.mdpi.com/1424-2818/14/1/22)
Supplement: s1 [file s1]

**Table S1.** The number of places where the appearance of *Cydalima perspectalis* was recorded and the number of reports of insects in individual voivodships, in 2018-2020<sup>1</sup>.

| Voivodeship         | Number<br>on the<br>map | Number of places |      |      | Number of records |      |      |
|---------------------|-------------------------|------------------|------|------|-------------------|------|------|
|                     |                         | 2018             | 2019 | 2020 | 2018              | 2019 | 2020 |
| POLAND              | 1-16                    | 57               | 77   | 148  | 166               | 188  | 320  |
| West Pomeranian     | 1                       | 0                | 1    | 1    | 0                 | 1    | 3    |
| Pomeranian          | 2                       | 0                | 1    | 1    | 0                 | 3    | 1    |
| Warmian-Masurian    | 3                       | 0                | 0    | 3    | 0                 | 0    | 5    |
| Lubusz              | 4                       | 0                | 3    | 6    | 0                 | 3    | 6    |
| Greater Poland      | 5                       | 3                | 4    | 12   | 3                 | 8    | 23   |
| Kuyavian-Pomeranian | 6                       | 0                | 0    | 2    | 0                 | 0    | 4    |
| Masovian            | 7                       | 6                | 5    | 13   | 17                | 17   | 29   |
| Podlaskie           | 8                       | 0                | 0    | 6    | 0                 | 0    | 8    |
| Lower Silesian      | 9                       | 7                | 5    | 8    | 19                | 23   | 19   |
| Łódź                | 10                      | 4                | 1    | 9    | 4                 | 1    | 14   |
| Holy Cross          | 11                      | 2                | 2    | 7    | 2                 | 4    | 9    |
| Lublin              | 12                      | 3                | 4    | 10   | 11                | 11   | 19   |
| Opole               | 13                      | 2                | 4    | 5    | 10                | 4    | 11   |
| Silesian            | 14                      | 11               | 22   | 26   | 18                | 38   | 42   |
| Lesser Poland       | 15                      | 8                | 10   | 12   | 28                | 25   | 36   |
| Subcarpathian       | 16                      | 11               | 15   | 27   | 54                | 50   | 91   |

<sup>1</sup> More details see supplementary materials: S2.
